# Supplementary material for: The Role of Nephronectin on Proliferation and Differentiation in Human Dental Pulp Stem Cells
Source: PubMed Central journal article supplement (PMC5735320; doi:10.1155/2017/2546261), 2017-11-19
Supplement: 2546261.f1.pdf [file 2546261.f1.pdf]

## CERTIFICATE OF ANALYSIS

**Product Code:** PT-5025  
**Product:** Human Dental Pulp  
Stem Cells 1M

**Lot Number:** 0000361427  
**Manufacture Date:** 21-Mar-2013

| TEST (Method)                    | SPECIFICATIONS |       | Results      |
|----------------------------------|----------------|-------|--------------|
|                                  | Min.           | Max.  |              |
| Tissue Acquisition Number        | ***            | ***   | 25885        |
| DONOR CHARACTERISTICS            |                |       |              |
| Age                              | ***            | ***   | 16 Y         |
| Sex                              | ***            | ***   | MALE         |
| Race                             | ***            | ***   | UNKNOWN      |
| VIRUS TESTING                    |                |       |              |
| HIV Test                         | ***            | ***   | Not Detected |
| HBV Test                         | ***            | ***   | Not Detected |
| HCV Test                         | ***            | ***   | Not Detected |
| MICROBIAL TESTING                |                |       |              |
| Sterility Test                   | ***            | ***   | Negative     |
| Mycoplasma                       | ***            | ***   | Negative     |
| CELL PERFORMANCE TESTING         |                |       |              |
| Viability                        | >=70%          | ***   | 86 %         |
| Cell Count (cells/vial)          | >=1x10E+6      | ***   | 1470000      |
| Total Population Doublings       | >=10           | ***   | 13           |
| Seeding Efficiency               | >=25%          | 999   | 92 %         |
| CD34, CD45, & CD133              | ***            | <=10% | < 10.0 %     |
| CD105, CD166, CD29, CD90, & CD73 | >=90%          | ***   | > 90.0 %     |

These cells were isolated from donated human tissue after obtaining permission for research use by informed consent or legal authorization. This product is for research use only. Details concerning the use of our cell and media products can be downloaded from our website at [www.lonza.com/cell-protocols](http://www.lonza.com/cell-protocols).

This lot has been reviewed by Quality Assurance in compliance with requirements of Lonza's Quality System.

This document was generated from a validated Part 11-compliant electronic system and thus handwritten signatures are not required.
